# Supplementary material for: Construction of a zero-dimensional halide perovskite in micron scale towards a deeper understanding of phase transformation mechanism and fluorescence applications
Source: Royal Society of Chemistry journal article supplement (doi:10.1039/d4ra06404f), 2024-01-01
Supplement: d4ra06404f1.pdf [file d4ra06404f1.pdf]

## Supporting Information

### Construction of Zero-Dimensional Halide Perovskite in Micron Scale towards a Deeper Understanding of Phase Transformations Mechanism and Fluorescent applications

Lili Xie,<sup>#a</sup> Haiyan Qiu,<sup>#a</sup> Yuxin Chen,<sup>a</sup> Yingxue Lu,<sup>a</sup> Yanyan Chen,<sup>b</sup> Lanlan Chen,<sup>b</sup> Shanwen Hu<sup>\*a</sup>

a. Department of Health Inspection and Quarantine, School of Public Health, Fujian Medical University, Fuzhou, Fujian, 350122, P.R. China.

b. College of Chemistry, Key Laboratory of Analysis and detecting technology, Food Safety MOE, Fuzhou University, Fuzhou 350002, Fujian, P.R. China.

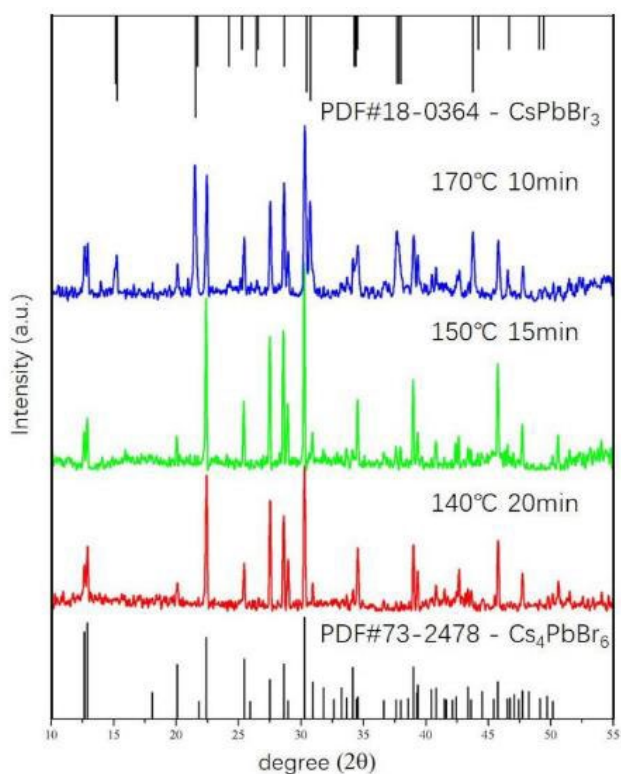

**Fig. S1** XRD spectra of Cs<sub>4</sub>PbBr<sub>6</sub> synthesized under different reaction conditions.

**Table. S1** Information of ligands used in the synthesis

|              |                                                                                    |
|--------------|------------------------------------------------------------------------------------|
| oleic acid   | 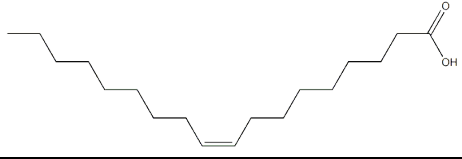 |
| Oleyl amine  |  |
| octoic acid  |  |
| octyl amine  |  |
| ethylic acid |  |

**Table. S2** The size of products with different ratio of ligands

| oleic acid<br>(mL) | Oleylamine<br>(mL) | octyl amine<br>(mL) | ethylic acid<br>(mL) | Products size                        |
|--------------------|--------------------|---------------------|----------------------|--------------------------------------|
| 0.8                | 0.8                | 0.8                 | 0                    | (0.5~1.0 $\mu\text{m}$ )*400 nm      |
| 0.8                | 0.8                | 0.8                 | 0.1                  | (0.8~1.4 $\mu\text{m}$ )*400 nm      |
| 0.8                | 0.8                | 0.8                 | 0.4                  | (2.5~4 $\mu\text{m}$ )*400 nm        |
| 0.6                | 0.8                | 0.8                 | 0.4                  | (2.5~3 $\mu\text{m}$ )*400 nm        |
| 1.2                | 0.8                | 0.8                 | 0.4                  | (6~7 $\mu\text{m}$ )*400 nm          |
| 0.8                | 0.8                | 0.6                 | 0.4                  | 500 nm*500 nm                        |
| 0.8                | 0.8                | 1.2                 | 0.4                  | 20 $\mu\text{m}$ *500 nm             |
| 0.8                | 0.6                | 0.8                 | 0.4                  | 2.5 $\mu\text{m}$ *2.5 $\mu\text{m}$ |
| 0.8                | 1.2                | 0.8                 | 0.4                  | 2.27 $\mu\text{m}$ *300 nm           |
| 1.4                | 0.8                | 0.8                 | 0.6                  | (9~10 $\mu\text{m}$ )*700 nm         |

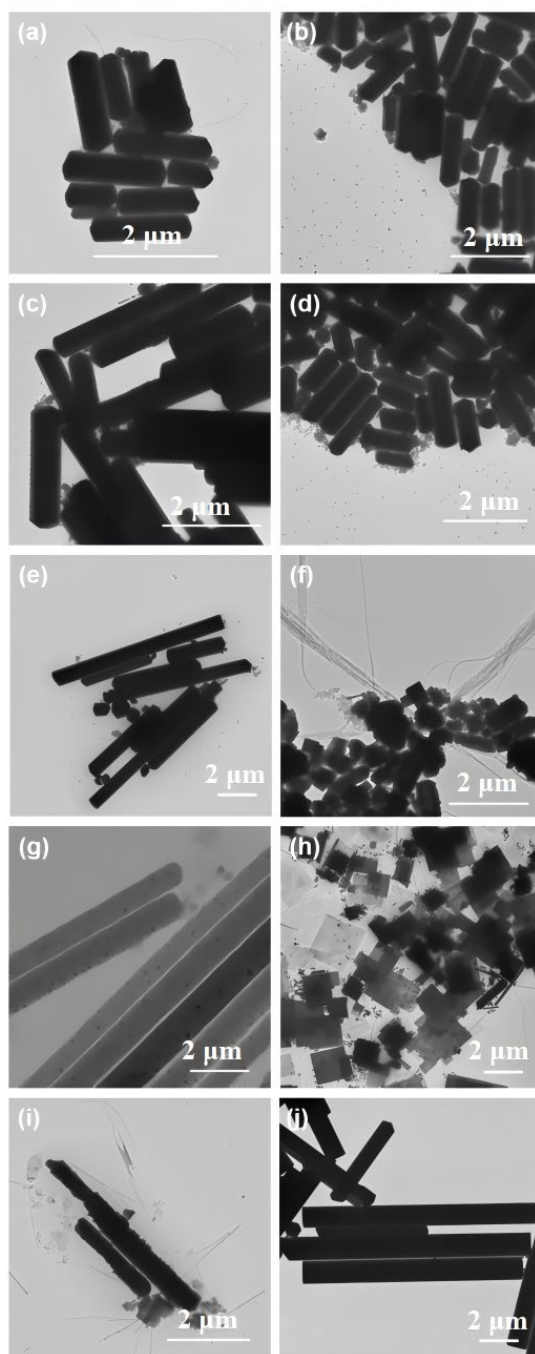

**Fig. S2** TEM images of Cs<sub>4</sub>PbBr<sub>6</sub> synthesized with different ratio of ligands.

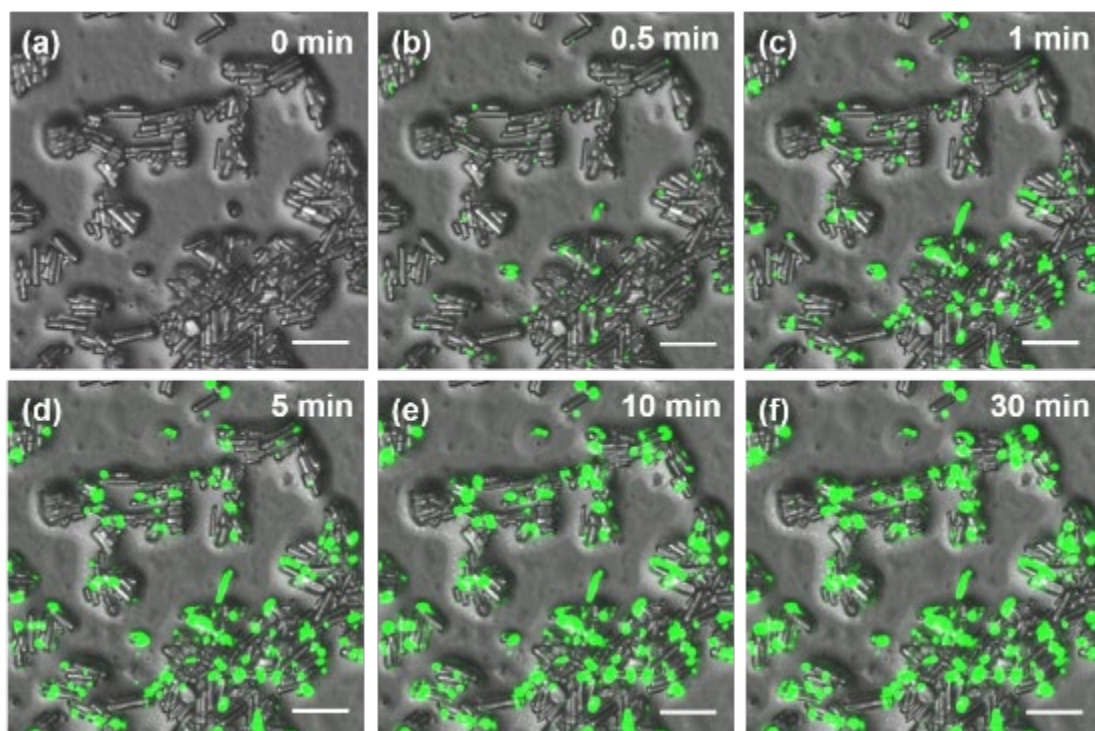

**Fig. S3** CLSM image of micro scale  $\text{Cs}_4\text{PbBr}_6$  with airborne water induced transformation. The legend is 10  $\mu\text{m}$ , with excited wavelength 488 nm.
